# Supplementary material for: Simultaneous detection of clenbuterol and ractopamine based on multiplexed competitive surface enhanced Raman scattering (SERS) immunoassay
Source: Royal Society of Chemistry journal article supplement (doi:10.1039/c7nj01394a), 2017-01-01
Supplement: c7nj01394a1.pdf [file c7nj01394a1.pdf]

## **Supporting Information**

### **Simultaneous Detection of Clenbuterol and Ractopamine Basing on Multiplexed Competitive Surface Enhanced Raman Scattering (SERS) Immunoassay**

Meng Yu<sup>a</sup>, Yongjun Hu<sup>a\*</sup>, and Jianzhi Liu<sup>b</sup>

<sup>a</sup> Ministry of Education Key Laboratory of Laser Life Science & Institute of Laser  
Life Science, College of Biophotonics, South China Normal University, Guangzhou  
510631, People's Republic of China

<sup>b</sup> School of Life Sciences, Sun Yat-sen University, Guangzhou 510275, People's  
Republic of China

**\*\* Corresponding author. Tel: +862119208713; fax: +862085216052**

Email: [yjhu@scnu.edu.cn](mailto:yjhu@scnu.edu.cn)

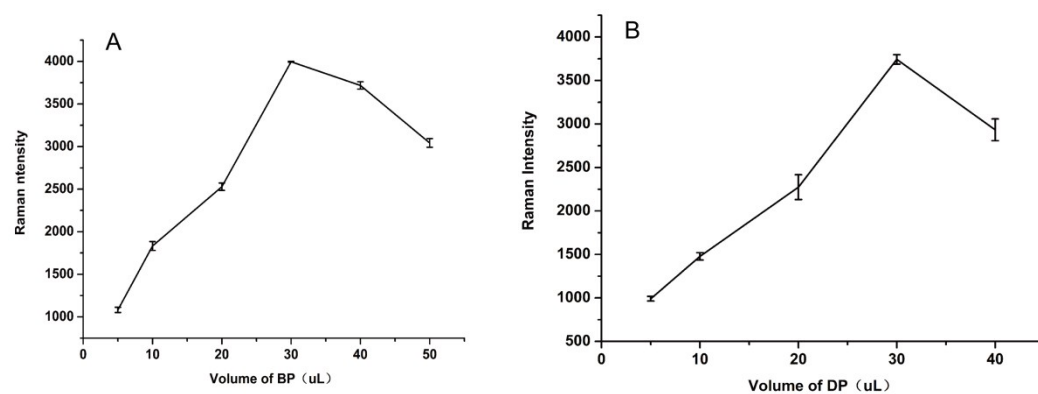

**Fig. S1** (A) SERS signal intensity with different volumes of BP solutions. (B) SERS signal intensity with different volumes of DP solutions.

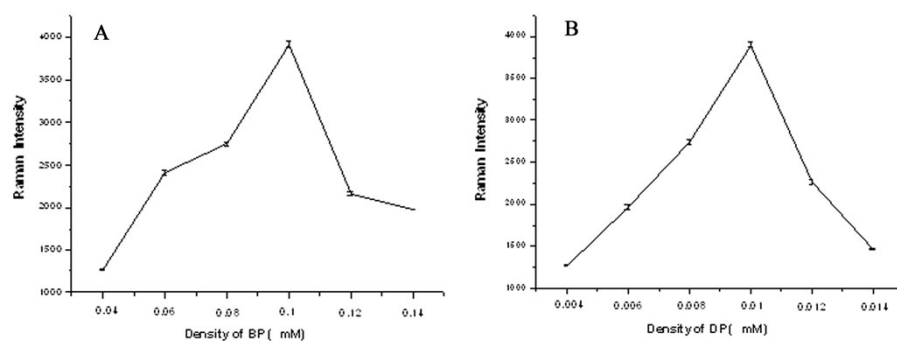

**Fig. S2** (A) SERS signal intensity with different concentrations of BP solutions. (B) SERS signal intensity with different concentrations of DP solutions.

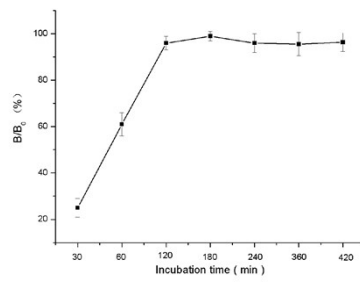

**Fig. S3** SERS signal intensity with different incubation time.

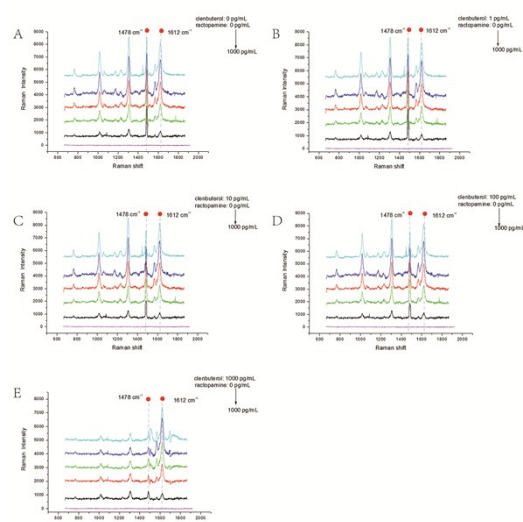

**Fig. S4** (A) SERS spectra acquired with clenbuterol at 0 pg/mL and different ractopamine concentrations. (B) SERS spectra acquired with clenbuterol at 1 pg/mL and different ractopamine concentrations. (C) SERS spectra acquired with clenbuterol at 10 pg/mL and different ractopamine concentrations. (D) SERS spectra acquired with clenbuterol at 100 pg/mL and different ractopamine concentrations. (E) SERS spectra acquired with clenbuterol at 1000 pg/mL and different ractopamine concentrations.

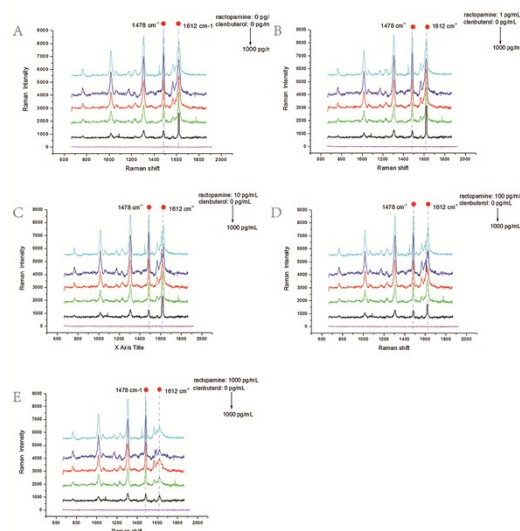

**Fig. S5** (A) SERS spectra acquired with ractopamine at 0 pg/mL and different clenbuterol concentrations. (B) SERS spectra acquired with ractopamine at 1 pg/mL and different clenbuterol concentrations. (C) SERS spectra acquired with ractopamine at 10 pg/mL and different clenbuterol concentrations. (D) SERS spectra acquired with ractopamine at 100 pg/mL and different clenbuterol concentrations. (E) SERS spectra acquired with ractopamine at 1000 pg/mL and different clenbuterol concentrations.
